# Supplementary material for: Artificial intelligence for the detection of COVID-19 pneumonia on chest CT using multinational datasets
Source: PubMed Central journal article supplement (PMC7429815; doi:10.1038/s41467-020-17971-2), 2020-08-14
Supplement: 41467_2020_17971_MOESM1_ESM.pdf [file 41467_2020_17971_MOESM1_ESM.pdf]

**Supplementary Table 1. Test Results by center/disease entity**

| <b>Disease Cohort</b>    | <b>Center</b> | <b>hybrid 3D</b> |              |                 | <b>full 3D</b> |              |                 |
|--------------------------|---------------|------------------|--------------|-----------------|----------------|--------------|-----------------|
|                          |               | <b>other</b>     | <b>covid</b> | <b>Accuracy</b> | <b>other</b>   | <b>covid</b> | <b>Accuracy</b> |
| COVID-19                 | Hubei, China  | 23               | 184          | 0.889           | 24             | 183          | 0.884           |
|                          | Milan, Italy  | 16               | 38           | 0.704           | 15             | 39           | 0.720           |
|                          | Tokyo, Japan  | 3                | 46           | 0.939           | 6              | 43           | 0.876           |
|                          | Milan, Italy  | 5                | 10           | 0.667           | 6              | 9            | 0.6             |
|                          | SUNY, USA     | 1                | 0            | 0.0             | 1              | 0            | 0.0             |
| any clinical indication  | SUNY, USA     | 453              | 47           | 0.906           | 457            | 43           | 0.914           |
| cancer diagnosis/staging | LIDC [ref]    | 256              | 15           | 0.945           | 266            | 5            | 0.982           |
|                          | NIH, USA      | 92               | 8            | 0.920           | 91             | 9            | 0.910           |
| Pneumonia                | SUNY, USA     | 110              | 30           | 0.786           | 126            | 14           | 0.900           |
| <i>All</i>               |               | <i>959</i>       | <i>378</i>   | <i>0.889</i>    | <i>992</i>     | <i>345</i>   | <i>0.908</i>    |

**Supplementary Table 2.** Clinical Indications for SUNY all-comer patient population, including all patients and test-only patients with false-positive rates by 3D classification model

| <b>Indication</b>      | <b>All Patients</b> | <b>Test Set</b> |                                             |
|------------------------|---------------------|-----------------|---------------------------------------------|
|                        | N(%)                | N(%)            | False Positive Rate<br>by 3D classification |
| oncology               | 292 (30.7%)         | 165 (32.9%)     | 0.055                                       |
| lung nodule evaluation | 188 (19.8%)         | 74 (14.8%)      | 0.027                                       |
| acute respiratory      | 145 (15.3%)         | 68 (13.6%)      | 0.103                                       |
| infectious disease     | 59 (6.5%)           | 23 (4.6%)       | 0.087                                       |
| acute cardiac          | 44 (4.6%)           | 22 (4.4%)       | 0.273                                       |
| trauma                 | 43 (4.5%)           | 22 (4.4%)       | 0.273                                       |
| other                  | 178 (18.7%)         | 127 (25.3%)     | 0.087                                       |
| <b>Total</b>           | <b>950</b>          | <b>501</b>      | <b>0.086</b>                                |

**Supplementary Table 3. Image Acquisition Characteristics**

| Disease Cohort           | Center             | in-plane resolution | slice thickness |    |       |               |       |     |     | KVP         | Scanner Manufacturer             |
|--------------------------|--------------------|---------------------|-----------------|----|-------|---------------|-------|-----|-----|-------------|----------------------------------|
|                          |                    |                     | t<1             | 1  | 1<t<2 | 2             | 2<t<5 | 5   | t>5 |             |                                  |
| COVID-19                 | Hubei, China       | 0.755 (0.30-1.11)   | 4               | 17 |       | $\frac{2}{4}$ | 1     | 652 |     | 80-120 KVP  | TOSHIBA, GE                      |
|                          | Milan, Italy       | 0.731 (0.57-0.95)   |                 |    | 6     |               |       | 120 | 8   | 120-140 KVP | GE                               |
|                          | Tokyo, Japan       | 0.729 (0.53-0.89)   |                 |    | 7     | 1             | 3     | 169 |     | 70-130 KVP  | TOSHIBA, GE,<br>SIEMENS, HITACHI |
|                          | Milan, Italy       | 0.756 (0.56-0.98)   |                 |    |       |               | 14    | 1   |     | 100-120     | SIEMENS                          |
|                          | Syracuse, NY, USA  | * see footnote      |                 |    |       |               |       | 1   |     |             |                                  |
| any clinical indication  | Syracuse, NY, USA  | 0.714 (0.33-1.03)   | 69              | 85 | 107   |               | 11    | 677 | 1   | 80-140 KVP  | TOSHIBA, GE,<br>SIEMENS, PHILIPS |
| cancer diagnosis/staging | LIDC <sup>19</sup> | 0.703 (0.46-0.98)   | 74              | 49 | 124   | $\frac{1}{8}$ | 203   | 2   |     | 110-150 KVP | TOSHIBA, GE,<br>SIEMENS, PHILIPS |
|                          | NIH, USA           | 0.849 (0.67-0.98)   | 1               | 28 |       |               | 3     | 68  |     | 90-130 KVP  | TOSHIBA, GE, SIEMENS             |
| Pneumonia                | SUNY, USA          | 0.721 (0.51-0.78)   | 2               | 4  | 14    | 1             |       | 120 |     | 80-140 KVP  | TOSHIBA, GE,<br>SIEMENS, PHILIPS |
|                          | NIH, USA           | 0.664 (0.47,0.93)   | 5               | 1  |       | 1             | 2     | 19  | 1   | 80/120 KVP  | TOSHIBA, GE,<br>SIEMENS, PHILIPS |

**Supplementary Table 4: Microbiology of Pneumonia Test Dataset**

| <b>Viral Pneumonia</b> |           | <b>Bacterial Pneumonia</b>             |           |
|------------------------|-----------|----------------------------------------|-----------|
| Influenza A H3         | 22        | Pseudomonas aeruginosa                 | 8         |
| Influenza A 2009 H1    | 16        | MRSA                                   | 8         |
| Influenza B            | 9         | Staphylococcus-coagulase positive      | 4         |
| Influenza A            | 8         | Haemophilus influenzae B lactamase (-) | 3         |
| Rhinovirus/Enterovirus | 5         | MSSA                                   | 2         |
| Adenovirus             | 2         | Streptococcus pneumoniae               | 2         |
| Influenza A H3 virus   | 2         | Corynebacterium striatum               | 2         |
| Parainfluenza virus 3  | 2         | L. pneumophila serogroup 1 antigen     | 1         |
| Adenovrius             | 1         | Mycobacterium gordonae                 | 1         |
| CMV                    | 1         | Streptococcus Group A antigen          | 1         |
| Coronavirus NL63       | 1         | Proteus mirabilis                      | 1         |
|                        |           | Proteus vulgaris                       | 1         |
|                        |           | Mycobacterium mucogenicum              | 1         |
|                        |           | Providencia rettgeri                   | 1         |
|                        |           | Achromobacter xylooxidans              | 1         |
|                        |           | Escherichia coli                       | 1         |
|                        |           | Mycobacterium intracellulare           | 1         |
|                        |           | Serratia marcencens                    | 1         |
|                        |           | Pseudomonas flurensens                 | 1         |
|                        |           | Streptococcus constellatus             | 1         |
|                        |           | Streptococcus intermedius              | 1         |
|                        |           | Actinomyces meyeri                     | 1         |
| <b>Total Virus</b>     | <b>69</b> | <b>Total bacterial</b>                 | <b>44</b> |

**Sensitivity, Specificity, and Accuracy vs. Probability of COVID-19**

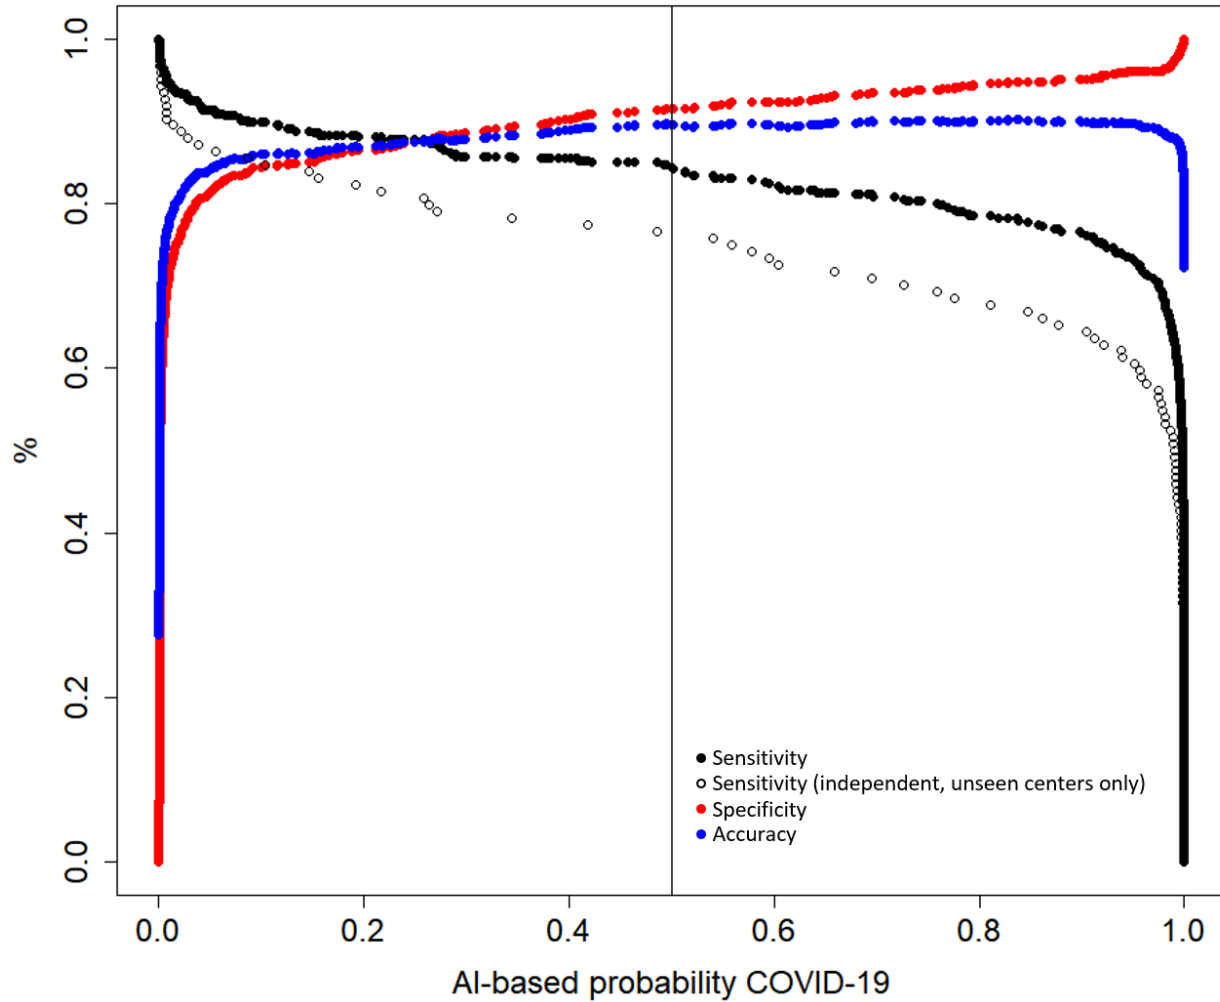

**Supplementary Figure 1.** Output of AI-based model for prediction of COVID-19 vs. Accuracy, Sensitivity, and Specificity from generalizability experiment with independent testing populations from Japan and Italy for 3D model. Probability refers to output of AI model, with 0.5 (horizontal line) corresponding to threshold for determination of COVID-19 classification.

### Sensitivity, Specificity, and Accuracy vs. Probability of COVID-19

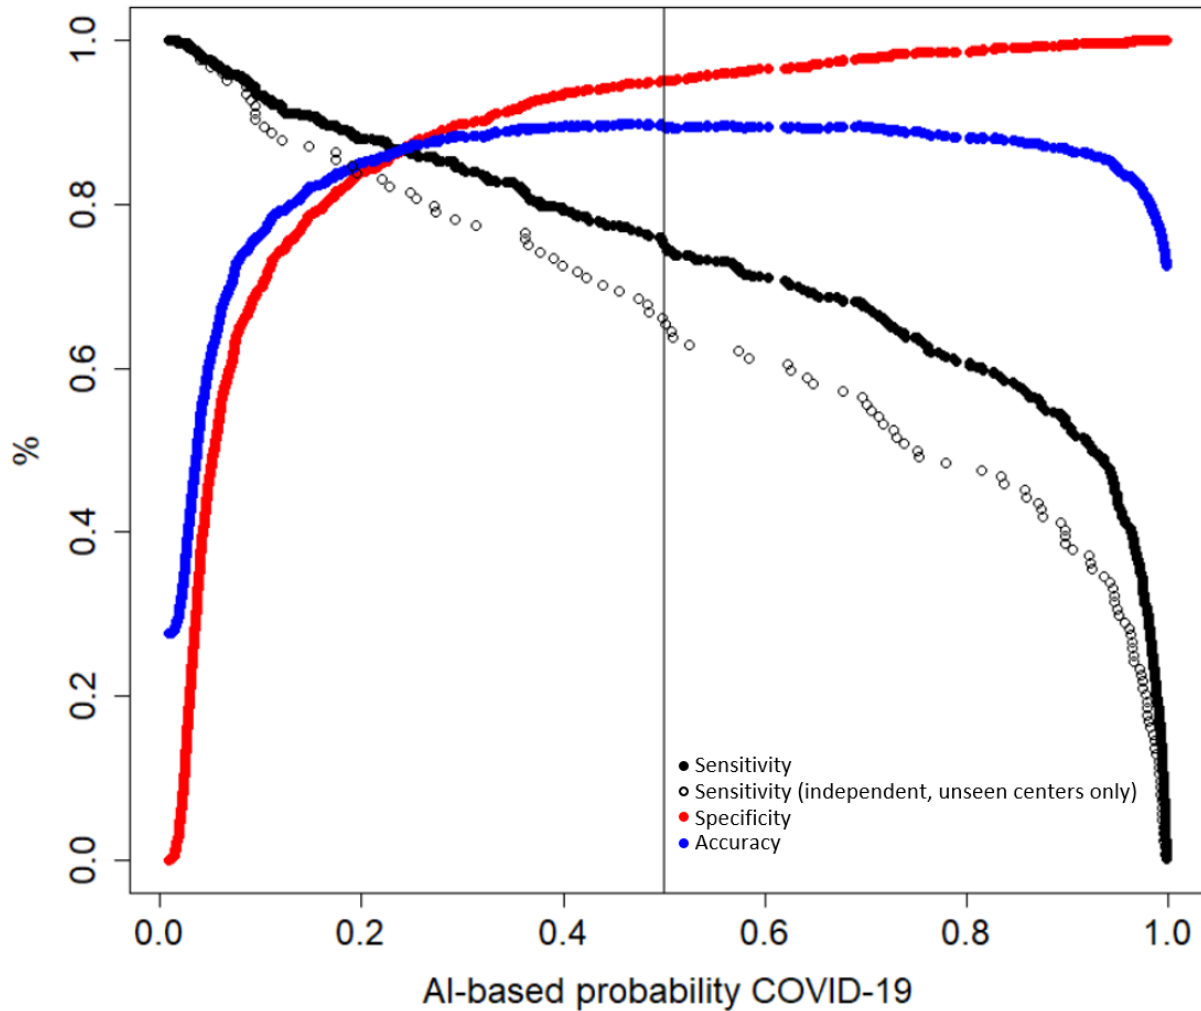

**Supplementary Figure 2.** Output of AI-based model for prediction of COVID-19 vs. Accuracy, Sensitivity, and Specificity from generalizability experiment with independent testing populations from Japan and Italy for Hybrid 3D model. Probability refers to output of AI model, with 0.5 (horizontal line) corresponding to threshold for determination of COVID-19 classification.

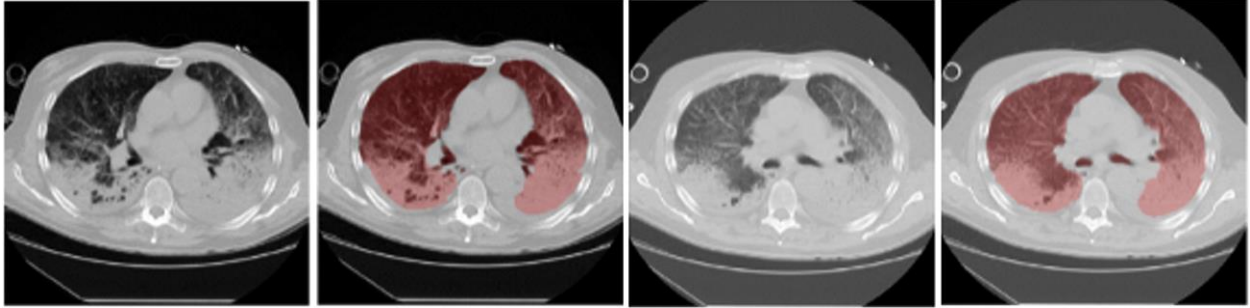

**Supplementary Figure 3.** Lung segmentation in two test cases with extensive consolidation related to COVID-19 pneumonia.
